# Supplementary material for: Senescence-like phenotype in post-mitotic cells of mice entering middle age
Source: PubMed Central journal article supplement (PMC7425512; doi:10.18632/aging.103637), 2020-07-31
Supplement: aging-12-103637-s001..pdf [file aging-12-103637-s001..pdf]

## SUPPLEMENTARY FIGURES

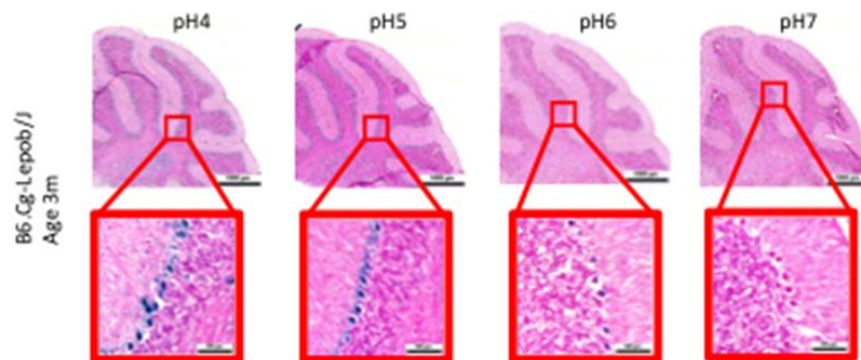

**Supplementary Figure 1. pH-dependent (pH 4 to pH 7)  $\beta$ -gal activity in frozen sections of mouse cerebellum from 3 month old leptin receptor-deficient *ob/ob* mice.** Nuclear Fast Red was used for counterstaining. At pH 6, specific for SA- $\beta$ -gal, bluish color from  $\beta$ -gal activity is evident specifically in the Purkinje cell layer. Representative images from 3 different mice per genotype are shown.

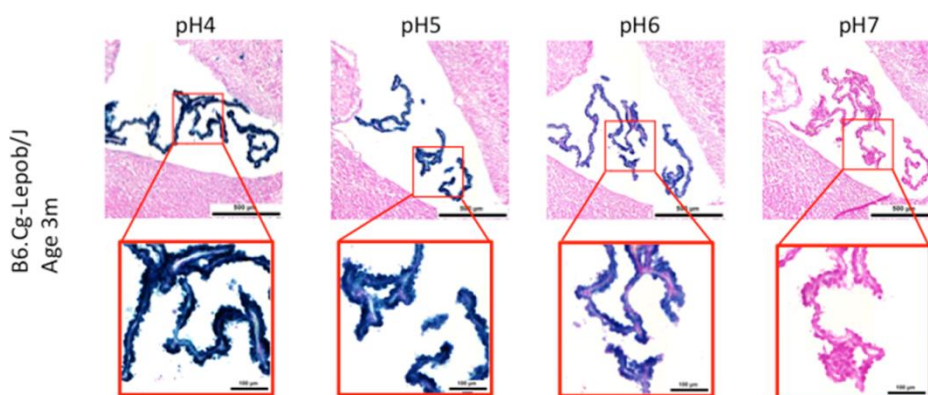

**Supplementary Figure 2. pH-dependent (pH 4 to pH 7)  $\beta$ -gal activity in frozen sections of choroid plexus from 3 months old leptin receptor-deficient *ob/ob* mice.** Nuclear Fast Red was used for counterstaining. At pH 6, specific for SA- $\beta$ -gal, bluish color from  $\beta$ -gal activity is evident specifically in ependymal cells in the choroid plexus. Representative images from 3 different mice are shown.
